# Supplementary material for: How Do We Assess Patient Skills in a Competence-Based Program? Assessment of Patient Competences Using the Spanish Version of the Prolapse and Incontinence Knowledge Questionnaire and Real Practical Cases in Women with Pelvic Floor Disorders
Source: MDPI journal article supplement (doi:10.3390/ijerph18052377), 2021-03-01
Supplement: s1 [file s1]

## ENCUESTA DE CONOCIMIENTOS SOBRE LA INCONTINENCIA Y EL PROLAPSO

### Cuestionario a

A continuación, le presentamos una serie de preguntas sobre incontinencia urinaria (pérdida de orina o disfunción de la vejiga). Por favor, conteste en cada una de las afirmaciones si está usted de acuerdo, en desacuerdo o no lo sabe.

1. La incontinencia urinaria (pérdida de orina o disfunción de la vejiga) es más común en mujeres jóvenes que en mujeres mayores.

☐

De acuerdo

☐

Desacuerdo

☐

No lo sé

2. Las disfunciones de vejiga son más frecuentes en mujeres que en hombres.

☐

De acuerdo

☐

Desacuerdo

☐

No lo sé

3. No se puede hacer mucho para tratar las pérdidas de orina, a excepción del uso de compresas y pañales.

☐

De acuerdo

☐

Desacuerdo

☐

No lo sé

4. Para el tratamiento de la pérdida de orina **no** es importante realizar un diagnóstico previo del tipo de pérdida.

☐

De acuerdo

☐

Desacuerdo

☐

No lo sé

5. Las pérdidas de orina pueden deberse a múltiples causas.

☐

De acuerdo

☐

Desacuerdo

☐

No lo sé

6. Efectivamente, los ejercicios pueden ayudarnos a controlar la pérdida de orina.

☐

De acuerdo

☐

Desacuerdo

☐

No lo sé

7. Algunos medicamentos pueden causar la pérdida de orina.

☐

De acuerdo

☐

Desacuerdo

☐

No lo sé

8. Una vez que la persona comienza a perder orina, nunca vuelve a ser capaz de controlarla.

☐

De acuerdo

☐

Desacuerdo

☐

No lo sé

9. Para diagnosticar las pérdidas de orina los médicos pueden hacer test especiales según el tipo de disfunción de vejiga.

☐

De acuerdo

☐

Desacuerdo

☐

No lo sé

10. La cirugía es el único tratamiento para las pérdidas de orina.

☐

De acuerdo

☐

Desacuerdo

☐

No lo sé

11. Dar a luz muchas veces puede causar pérdidas de orina.

☐

De acuerdo

☐

Desacuerdo

☐

No lo sé

12. La mayoría de la gente que tiene pérdidas de orina puede curarse o mejorar con algún tipo de tratamiento.

☐

De acuerdo

☐

Desacuerdo

☐

No lo sé

## Cuestionario b

A continuación, le presentamos una serie de preguntas sobre el prolapso de órganos pélvicos (que supone el descenso (prolapso) de la vagina, útero, vejiga o recto a través de la vagina). Por favor, conteste en cada una de las preguntas si está usted de acuerdo o en desacuerdo, o no lo sabe.

1. El prolapso de órganos pélvicos (descenso de vagina, útero, vejiga o recto) es más frecuente en mujeres jóvenes que en mujeres mayores.

☐

De acuerdo

☐

Desacuerdo

☐

No lo sé

2. Dar a luz muchas veces puede provocar prolapso de órganos pélvicos.

☐

De acuerdo

☐

Desacuerdo

☐

No lo sé

3. El prolapso de órganos pélvicos puede aparecer a cualquier edad.

☐

De acuerdo

☐

Desacuerdo

☐

No lo sé

4. Ciertos ejercicios pueden ayudar a detener o evitar que el prolapso de órganos pélvicos empeore.

☐

De acuerdo

☐

Desacuerdo

☐

No lo sé

5. Los síntomas del prolapso de órganos pélvicos pueden incluir pesadez y/o presión en la pelvis.

☐

De acuerdo

☐

Desacuerdo

☐

No lo sé

6. Examinar a la paciente es una buena manera para que un médico diagnostique un prolapso de órganos.

☐

De acuerdo

☐

Desacuerdo

☐

No lo sé

7. Una vez que la paciente tiene un prolapso de órganos pélvicos, **no** se puede hacer mucho para ayudarla.

☐

De acuerdo

☐

Desacuerdo

☐

No lo sé

8. Levantar peso a diario puede provocar un prolapso de órganos pélvicos.

☐

De acuerdo

☐

Desacuerdo

☐

No lo sé

9. La cirugía es un tipo de tratamiento para el prolapso de órganos pélvicos.

☐

De acuerdo

☐

Desacuerdo

☐

No lo sé

10. Los médicos pueden realizar una prueba en sangre para diagnosticar un prolapso de órganos pélvicos.

☐

De acuerdo

☐

Desacuerdo

☐

No lo sé

11. Los síntomas del prolapso de los órganos pélvicos pueden tratarse con un anillo de goma llamado pesario.

☐

De acuerdo

☐

Desacuerdo

☐

No lo sé

12. Las personas obesas tienen **menos** probabilidad de tener un prolapso de órganos pélvicos.

☐

De acuerdo

☐

Desacuerdo

☐

No lo sé

## RESPUESTAS A LA ENCUESTA DE CONOCIMIENTOS SOBRE LA INCONTINENCIA Y EL PROLAPSO

| Preguntas escala de incontinencia urinaria                                                                                        | Respuesta Correcta | Tipo |
|-----------------------------------------------------------------------------------------------------------------------------------|--------------------|------|
| 1. La incontinencia urinaria (pérdida de orina o disfunción de la vejiga) es más común en mujeres jóvenes que en mujeres mayores. | Desacuerdo         | E    |
| 2. Las disfunciones de vejiga son más frecuentes en mujeres que en hombres.                                                       | De acuerdo         | E    |
| 3. No se puede hacer mucho para tratar las pérdidas de orina, a excepción del uso de compresas y pañales.                         | Desacuerdo         | T    |
| 4. Para el tratamiento de la pérdida de orina <b>no</b> es importante realizar un diagnóstico previo del tipo de pérdida.         | Desacuerdo         | D    |
| 5. Las pérdidas de orina pueden deberse a múltiples causas.                                                                       | De acuerdo         | E    |
| 6. Efectivamente, los ejercicios pueden ayudarnos a controlar la pérdida de orina.                                                | De acuerdo         | T    |
| 7. Algunos medicamentos pueden causar la pérdida de orina.                                                                        | De acuerdo         | E    |
| 8. Una vez que la persona comienza a perder orina, nunca vuelve a ser capaz de controlarla.                                       | Desacuerdo         | T    |
| 9. Para diagnosticar las pérdidas de orina los médicos pueden hacer test especiales según el tipo de disfunción de vejiga.        | De acuerdo         | D    |
| 10. La cirugía es el único tratamiento para las pérdidas de orina.                                                                | Desacuerdo         | T    |
| 11. Dar a luz muchas veces puede causar pérdidas de orina.                                                                        | De acuerdo         | E    |
| 12. La mayoría de la gente que tiene pérdidas de orina puede curarse o mejorar con algún tipo de tratamiento.                     | De acuerdo         | T    |

| Preguntas escala del prolapso de órganos pélvicos                                                                                          | Respuesta Correcta | Tipo |
|--------------------------------------------------------------------------------------------------------------------------------------------|--------------------|------|
| 1. El prolapso de órganos pélvicos (descenso de vagina, útero, vejiga o recto) es más frecuente en mujeres jóvenes que en mujeres mayores. | Desacuerdo         | E    |
| 2. Dar a luz muchas veces puede provocar prolapso de órganos pélvicos.                                                                     | De acuerdo         | E    |
| 3. El prolapso de órganos pélvicos puede aparecer a cualquier edad.                                                                        | De acuerdo         | E    |
| 4. Ciertos ejercicios pueden ayudar a detener o evitar que el prolapso de órganos pélvicos empeore.                                        | De acuerdo         | T    |
| 5. Los síntomas del prolapso de órganos pélvicos pueden incluir pesadez y/o presión en la pelvis.                                          | De acuerdo         | E    |
| 6. Examinar a la paciente es una buena manera para que un médico diagnostique un prolapso de órganos.                                      | De acuerdo         | D    |
| 7. Una vez que la paciente tiene un prolapso de órganos pélvicos, no se puede hacer mucho para ayudarla.                                   | Desacuerdo         | T    |
| 8. Levantar peso a diario puede provocar un prolapso de órganos pélvicos.                                                                  | De acuerdo         | E    |
| 9. La cirugía es un tipo de tratamiento para el prolapso de órganos pélvicos.                                                              | De acuerdo         | T    |
| 10. Los médicos pueden realizar una prueba en sangre para diagnosticar un prolapso de órganos pélvicos.                                    | Desacuerdo         | D    |
| 11. Los síntomas del prolapso de los órganos pélvicos pueden tratarse con un anillo de goma llamado pesario.                               | De acuerdo         | T    |
| 12. Las personas obesas tienen menos probabilidad de tener un prolapso de órganos pélvicos.                                                | Desacuerdo         | E    |

Etiología (E); Diagnóstico (D); Tratamiento (T)
